# Supplementary material
Source: ML conference proceedings conference paper supplement (https://openreview.net/forum?id=OEawM2coNT)
Supplement: supplementary_material [file PartEvo_Appendix.pdf › Supplementary Material_PartEvo/PartEvo_Appendix.pdf]

## A Discussion: Comparison, Limitation, and Impact Statement

### A.1 Comparisons with Funsearch, EoH, and ReEvo

Funsearch [6] is one of the earliest LLM-assisted Evolutionary Search (LES) methods. Prior to this, the Algorithm Evolution using Large Language Model (AEL) [32] explored the use of prompt engineering to guide LLMs as evolutionary operators for searching knowledge-rich language spaces.

EoH [7] keenly recognized that LLMs can assist in searching the code space through higher-level thoughts. Consequently, EoH represents individuals using both code and thoughts, exploring the coevolution of thoughts and code within an evolutionary framework, which leads to superior performance while mitigating computational costs.

ReEvo [8] demonstrated that LLMs can provide verbal gradients through genetic cues, enabling more directed searches within the language search space. This approach effectively implements gradient-based search techniques in the language domain.

In terms of search strategies, Funsearch employs an island-based evolutionary approach to iteratively improve function quality by generating multiple islands in a random manner [6]. This island management promotes exploration and reduces the risk of premature convergence. In contrast, both EoH and ReEvo follow a single-population evolutionary framework, focusing on leveraging the capabilities of LLMs.

Our work introduces niche-based collaborative search mechanisms from evolutionary computation into LES, further enhancing search efficiency within language spaces. The proposed framework is general and can be easily integrated with existing LES approaches, with PartEvo serving as a specific instantiation of these core ideas. PartEvo first introduces feature-assisted niche construction to indirectly partition the language space into multiple subregions. It then defines prompt-centric operators (RE and SE) and EC-inspired operators (CN and LGE) for algorithm discovery processes. In the prompt-centric operators, LLMs are guided to generate promising algorithms through verbal gradients. The EC-inspired operators incorporate principles of niche collaboration and evolutionary heuristics to improve search efficiency. Experimental results demonstrate that the integration of niche-based techniques significantly improves algorithm discovery efficiency by over twofold, making LES more practical.

### A.2 Additional discussion and limitation

**Scenarios where PartEvo may not be suitable** A key requirement for PartEvo is the continuous validation of the generated algorithms. This requires that the problems to be solved are formulated as mathematical models or situated within environments that can be simulated. For example, with a sample budget of 500 and an evaluation budget of 30,000, a total of 15,000,000 evaluations would be required to assess the objective value of the solutions. For some expensive optimization problems (e.g., parameter optimization in computational fluid dynamics [52] or drug design [53]), the extensive evaluations required by PartEvo could result in prohibitive computational costs. A promising direction to address this is the use of surrogate models [54] to approximate objective values, which could accelerate the evaluation process and alleviate the computational burden. Alternatively, designing algorithms for similar, more computationally feasible problems and then transferring these algorithms to expensive optimization tasks may also provide an effective strategy. For large-scale problems, employing a divide-and-conquer approach [55] at a higher level to reduce problem complexity could enable PartEvo to focus on solving lower-level subproblems more efficiently.

**Cross-paradigm discussion** The LES is an emerging paradigm for automated algorithm discovery (AAD). This work primarily focuses on addressing the challenges of incorporating advanced evolutionary computation (EC) techniques into the LES paradigm, which is complicated by its abstract, language-based search space. Using the integration of niching techniques as a case study, we demonstrate significant improvements in the performance, efficiency, and robustness of the LES paradigm for AAD when successfully applying these advanced EC methods. However, the field of AAD also includes other established paradigms, such as Genetic Programming (GP) [56], Deep Learning (DL) [3], and Reinforcement Learning (RL) [4], which merit a more systematic comparison with the LES paradigm. Incorporating insights from related works [7, 28, 57–59], we provide a qualitative, literature-informed comparison across several key aspects in Table 7, highlighting these

distinctions. A comprehensive, systematic cross-paradigm comparative study is a valuable direction for future research, and we are committed to pursuing it. Existing work has already begun to explore such comparisons [28], and we plan to conduct a more thorough analysis to better understand the trade-offs between these distinct paradigms.

Table 7: A qualitative comparison of AAD paradigms

| Feature                     | LES                                                                                                                                                               | GP                                                                                                                                                                                             | DL or RL                                                                                                                    |
|-----------------------------|-------------------------------------------------------------------------------------------------------------------------------------------------------------------|------------------------------------------------------------------------------------------------------------------------------------------------------------------------------------------------|-----------------------------------------------------------------------------------------------------------------------------|
| Manual Design Cost          | <b>Low.</b> The framework automatically generates the algorithms based on a high-level task description, requiring minimal human effort.                          | <b>High.</b> Requires significant human effort to define problem-specific operators, functions, and grammar for the algorithm search space.                                                    | <b>High.</b> Requires extensive design of network architectures, training pipelines, and domain-specific datasets.          |
| Algorithm Design Efficiency | <b>High.</b> A new task can be solved in hours by relying on iterative LLM inference, without the need for model training or fine-tuning.                         | <b>High.</b> The core process is based solely on evolutionary operations, which are computationally fast on a per-step basis, but can still require many generations to find a good algorithm. | <b>Low.</b> Requires extensive training periods, often spanning days or weeks, for each specific task.                      |
| Resource requirements       | <b>High</b> (requires LLM inference). However, LLM inference tasks can be offloaded to third-party providers via API calls, reducing local hardware requirements. | <b>Low.</b> Runs on standard CPUs or GPUs, often without needing high-end hardware.                                                                                                            | <b>High.</b> Requires substantial GPU resources and large-scale parallel computation, especially during the training phase. |
| Extensibility               | <b>High.</b> Leverages the vast knowledge embedded in LLMs, allowing strong generalization to diverse algorithm design tasks with minimal adaptation.             | <b>Low.</b> Generalizing to a new problem often requires extensive manual redesign of the grammar and operators to build the algorithm space for the target problem.                           | <b>Low.</b> Generalizing to a new problem necessitates substantial data collection and lengthy retraining periods.          |

### A.3 Extended applications

PartEvo excels at searching for feasible solutions within the language space. In this work, we utilize PartEvo to design meta-heuristic algorithms from the ground up. In fact, any design task at the language level can be executed using this framework, including planning [60], strategy formulation [61], algorithm refinement, and more. Moreover, if LLMs are extended to those with multimodal capabilities [62], feature-assisted niche construction can still be applied within image spaces. In this case, tasks such as industrial design and blueprint drafting could also be automated.

### A.4 Impact statement

This paper advances the field of automated algorithm discovery by integrating EC-based evolutionary techniques with Large Language Models. The proposed method enhances search efficiency within language search spaces, offering significant potential for cost reduction and practical applications across diverse industries. Moreover, the algorithm evolution process generates valuable data, which can further accelerate research and development in this domain. By automating aspects of algorithm discovery, the role of human experts may transition from adapting algorithms for specific applications to focusing on higher-level innovation. However, this shift raises important considerations, including potential changes in labor demands and ethical challenges related to transparency and fairness in

AI-generated systems. We advocate for continued research to address these concerns and to promote the responsible and equitable deployment of this technology.

## B Additional experiment results

### B.1 Hyperparameters for PartEvo

Unless otherwise stated, we adopt the parameters in Table 8 for PartEvo runs. The entire experiment, including the implementation of PartEvo, EoH, and Funsearch for all four benchmarks, was developed in Python and executed on a single CPU (Intel i9-13980HX) with 32GB of RAM.

Table 8: Hyperparameter settings for PartEvo.

| Hyperparameter  | Parameter Description                                            | Value       |
|-----------------|------------------------------------------------------------------|-------------|
| $K$             | Number of niches to partition the population into                | 4           |
| $k$             | Number of cooperating niches selected in the CN operator         | 2           |
| $m$             | Number of parents selected in each evolution step                | 2           |
| $N$             | Population size                                                  | 16          |
| $E$             | Size of external archive                                         | 40          |
| LLM             | Version of LLM used in the evolutionary operators                | GPT-4o-mini |
| LLM temperature | Hyperparameter controlling the randomness of LLM text generation | 1           |

### B.2 Comparative evaluations under identical initialization

To ensure a rigorous comparison of the search behaviors of PartEvo, Funsearch, and EoH, we evaluate their performance using the same initial population. The initial population is iteratively generated by PartEvo and then shared across all other LES methods. Each method is independently run three times with the same initial population. The average results of these independent runs are summarized in Table 9. Even when eliminating the randomness introduced by initialization, PartEvo consistently outperforms the other methods across all cases. It is noteworthy that the performance of Funsearch, EoH, and ReEvo shows significant improvement when utilizing the initial population generated by PartEvo. This finding highlights the effectiveness of the batch initialization strategy employed by PartEvo.

Table 9: Average results from multiple runs on training and testing instances for each optimization problem (Under identical initialization)

| Problem | Instances | Funsearch          | EoH      | ReEvo         | PartEvo         |
|---------|-----------|--------------------|----------|---------------|-----------------|
| P1      | Training  | 9.769              | 1.846    | 1.572         | <b>0.074</b>    |
|         | Testing   | 0.879              | 1.646    | 1.013         | <b>0.023</b>    |
| P2      | Training  | 800.09             | 800.98   | 800.00        | <b>800.00</b>   |
|         | Testing   | 439.31             | 368.95   | <b>364.19</b> | 365.20          |
| P3      | Training  | 7042.21            | 7268.22  | 6564.44       | <b>6539.24</b>  |
|         | Testing   | 57696.53           | 61142.93 | 57455.34      | <b>56753.77</b> |
| P4      | Training  | 24289.3            | 19152.4  | 11102.3       | <b>6424.7</b>   |
|         | Testing   | $1.67 \times 10^5$ | 77134.3  | 79795.2       | <b>62731.4</b>  |

Figure 3 presents the convergence of the best objective function values over 500 samples for PartEvo, Funsearch, and EoH. Under the same initial population, the convergence behavior mirrors that observed in **Subsection 4.2**. Notably, PartEvo achieves superior results with fewer samples.

### B.3 Comparative evaluations on Online Bin Packing Benchmark

In the main paper, we established four benchmarks (P1-4) to showcase PartEvo’s design capabilities for meta-heuristic algorithms. To provide a more comprehensive evaluation, we further assess PartEvo

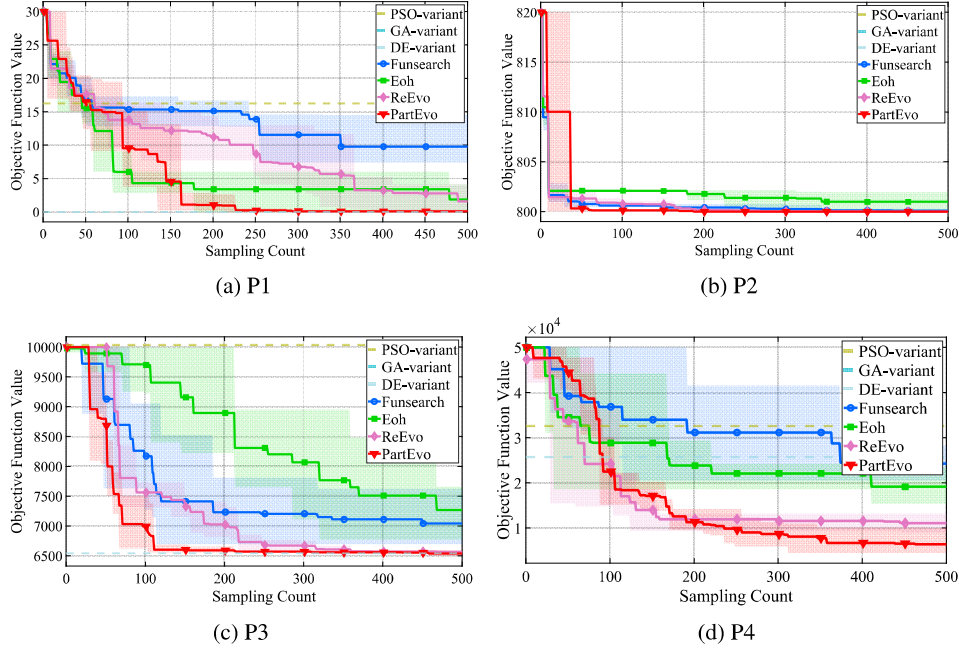

Figure 3: Convergence behavior of different LES methods using the same seed across four independent runs on Problems P1, P2, P3, and P4

alongside peer LES methods on the Online Bin Packing Benchmark for heuristic design, as utilized in EoH and Funsearch studies. Additionally, we compare the recent ReEvo approach on this task.

For consistency, a sample budget of 500 is applied across all methods, with a population size of 16, conducting four independent runs for each algorithm. Table 10 presents the fraction of excess bins (as a percentage) relative to the lower bound (with lower values indicating better performance) for various bin packing heuristics applied to Weibull instances.

Table 10: Average results from multiple runs on the Bin Package Benchmark (Lower is Better)

| Method    | 1k_C100     | 1k_C500     | 5k_C100     | 5k_C500     | 10k_C100    | 10k_C500    |
|-----------|-------------|-------------|-------------|-------------|-------------|-------------|
| First fit | 5.32        | 4.97        | 4.40        | 4.27        | 4.44        | 4.28        |
| Best fit  | 4.87        | 4.50        | 4.08        | 3.91        | 4.09        | 3.95        |
| EoH       | 4.76        | 4.38        | 2.32        | 2.18        | 2.04        | 1.97        |
| Funsearch | 4.07        | 4.69        | 3.19        | 3.56        | 3.16        | 3.44        |
| ReEvo     | 4.24        | 3.94        | 2.13        | 2.07        | 2.07        | 1.96        |
| PartEvo   | <b>3.51</b> | <b>3.23</b> | <b>1.14</b> | <b>1.11</b> | <b>0.84</b> | <b>0.79</b> |

First Fit and Best Fit are two human-designed heuristics. All LES methods surpass these baselines. The performance of all LES methods on the Bin Package Benchmark is consistent with the results from the four benchmarks presented in the main paper. PartEvo achieves the best average performance, proving its high efficiency in solving AAD tasks under limited budget constraints.

Notably, PartEvo and ReEvo outperform EoH and Funsearch, underscoring the advantages of Reflection and Summary. However, due to its unique EC-inspired operators (CN and LGE), PartEvo surpasses ReEvo. This highlights that both “verbal gradient” and advanced EC techniques can enhance search efficiency and should be equally emphasized.

#### B.4 Detailed feature analysis

Figure 4 presents the convergence behavior of the best objective values achieved by PartEvo when utilizing different feature sets on problems P1 and P2. Each feature set is evaluated through three



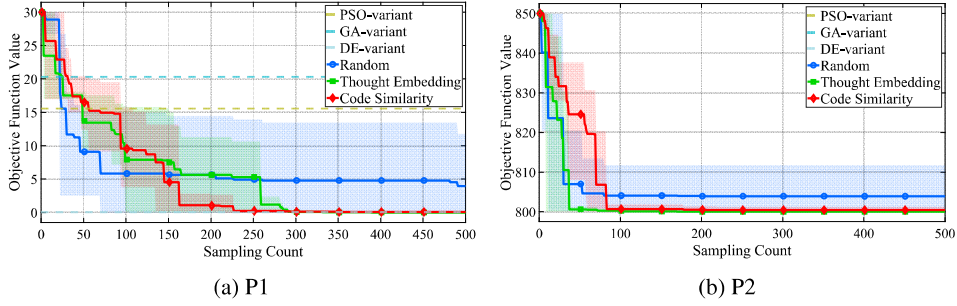

Figure 4: Impact of partitioning features on convergence in PartEvo on P1 and P2

independent runs, all initialized with the same population. As observed, PartEvo, when augmented with the *Code Similarity* and *Thought Embedding* features, consistently converges to high-quality algorithms. In contrast, the use of random features (depicted by the blue curves and shaded regions) leads to a broader range between the upper and lower envelopes, indicating greater instability in algorithm design.

These results emphasize the critical role of feature-assisted niche construction in enhancing the efficiency of automated algorithm discovery. Even with random partitioning, there is a chance that the resulting niches may coincidentally align in a way that facilitates the discovery of high-performing algorithms. This suggests that certain niche structures inherently lead to better outcomes. Notably, *Code Similarity* and *Thought Embedding*, as employed in this work, are two viable feature mapping strategies that markedly increase the reliability and efficiency of generating powerful algorithms with PartEvo.

### B.5 Detailed ablation study

To better understand the contributions of the four evolutionary operators in PartEvo, we conducted a comprehensive ablation study. The average performance across multiple runs for each ablation setting is summarized in Table 11. Variants of PartEvo with specific operators removed are denoted using the prefix “w/o” (e.g., w/o RE indicates the removal of the RE operator). For clarity, we restate the definitions of the key variants here, consistent with Subsection 4.4 in the main text:

- PartEvo<sup>†</sup>: Removes the RE and SE operators, which utilize additional LLMs to enhance prompts through reflection and summarization.
- PartEvo<sup>‡</sup>: Removes the CN and LGE operators, which implement subspace-based collaborative search.
- PartEvo<sup>♣</sup>: A baseline version that retains only crossover and mutation operations, excluding advanced prompt and subspace-based search strategies.

Table 11: Ablation study results on four benchmark problems.

| Method               | P1           | P2            | P3             | P4            | $\Delta\text{Perf} (\%)$ |
|----------------------|--------------|---------------|----------------|---------------|--------------------------|
| Full PartEvo         | <b>0.074</b> | <b>800.00</b> | <b>6539.24</b> | <b>6424.7</b> | 0.00                     |
| w/o RE               | 0.389        | 800.00        | 6915.27        | 8433.5        | 117.74                   |
| w/o SE               | 1.493        | 800.01        | 6610.28        | 13761.8       | 515.12                   |
| PartEvo <sup>†</sup> | 1.585        | 800.00        | 6946.69        | 15259.2       | 553.74                   |
| w/o CN               | 0.723        | 800.00        | 6547.89        | 11357.3       | 241.82                   |
| w/o LGE              | 0.873        | 800.04        | 6849.81        | 10491.9       | 290.98                   |
| PartEvo <sup>‡</sup> | 1.288        | 807.37        | 7651.28        | 14324.7       | 451.31                   |
| PartEvo <sup>♣</sup> | 7.248        | 807.58        | 8524.38        | 17924.0       | 2509.76                  |

The metric  $\Delta\text{Perf}(\%)$  quantifies the performance degradation relative to the full PartEvo, with larger values indicating greater declines. As shown in Table 11, each operator is critical to the overall efficiency of PartEvo.

- Removing either the reflection or summarization enhancement operators (RE or SE) results in significant performance drops ( $\Delta\text{Perf}=117.74\%$  and  $515.12\%$ , respectively). The impact is even more pronounced when both are removed ( $\Delta\text{Perf}=553.74\%$ ).
- Similarly, removing the subspace-based collaborative search operators (CN or LGE) leads to substantial degradations ( $\Delta\text{Perf}=241.82\%$  and  $290.98\%$ , respectively). The effect worsens when both are excluded ( $\Delta\text{Perf}=451.31\%$ ).
- The baseline version (PartEvo<sup>♠</sup>), which excludes all advanced operators and relies solely on basic evolutionary operations, experiences the most severe performance degradation ( $\Delta\text{Perf}=2509.76\%$ ).

These results underscore the importance of both prompt-centric and EC-inspired operators. By integrating these two aspects, PartEvo effectively combines the strengths of LLMs and niche-based EC techniques, demonstrating its potential as a robust LES method for automated algorithm discovery.

## B.6 Comparative evaluations with an expanded sample budget

PartEvo demonstrates superior efficiency in algorithm discovery under a limited sample budget of 500 LLM queries. To further assess its potential, we expand the budget to 2000 queries and evaluate performance on benchmarks P3 and P4. Benchmarks P1 and P2 are excluded from this analysis, as prior results indicate that 500 queries already suffice for PartEvo, ReEvo, and EoH to design meta-heuristics that approach optimal solutions. All four LES methods are initialized with the same random seed for fairness, as detailed in **Appendix B.2**. This experiment aims to: (i) examine whether PartEvo’s early-stage efficiency induces premature convergence that limits long-term performance; and (ii) investigate whether Funsearch, EoH, and ReEvo can exploit the larger budget to substantially improve their outcomes.

Table 12: Average results from three runs on training instances for benchmark P3 and P4

| Benchmark           | Budget | Funsearch | EoH     | ReEvo    | ParEvo         |
|---------------------|--------|-----------|---------|----------|----------------|
| P3                  | 500*   | 7042.20   | 7268.21 | 6564.44  | <b>6539.23</b> |
|                     | 2000   | 6656.7    | 6749.5  | 6506.51  | <b>6479.49</b> |
| P4                  | 500*   | 24289.3   | 19152.4 | 11102.32 | <b>6424.6</b>  |
|                     | 2000   | 15646.1   | 14235.5 | 6038.45  | <b>5489.0</b>  |
| Average Improvement |        | 20.53%    | 16.40%  | 23.25%   | 7.74%          |

Each method is independently executed three times under the 2000-sample budget. Table 12 reports the average performance, where lower values indicate better algorithm performance. Results marked with 500\* are drawn from Table 9.

As shown in Table 12, with an expanded budget of 2000 samples, PartEvo maintains its lead on both benchmarks P3 and P4, consistently outperforming Funsearch, EoH, and ReEvo. On P3, its performance improves modestly from 6539.23 to 6479.49 (0.92%), while on the more challenging P4, it achieves a significant gain from 6424.6 to 5489.0 (14.4%). These results demonstrate that while PartEvo is highly efficient at discovering effective algorithms early on, it does not suffer from premature convergence. Instead, it continues to refine its search and achieve better results as more computational budget is allocated.

Meanwhile, Funsearch, EoH, and ReEvo exhibit substantial improvements with a larger budget. ReEvo benefits most, with an average improvement of 23.25%, followed by Funsearch (20.53%) and EoH (16.40%). This suggests that additional queries provide these methods with much-needed exploration capacity. Nevertheless, their performance remains far behind PartEvo. Notably, even with 2000 queries, Funsearch (15646.1) and EoH (14235.5) perform worse than PartEvo with only 500 queries (6424.6). This finding highlights PartEvo’s remarkable efficiency in algorithm discovery, as it achieves up to 3–4 $\times$  higher effectiveness in complex problem settings with a fraction of the computational effort.

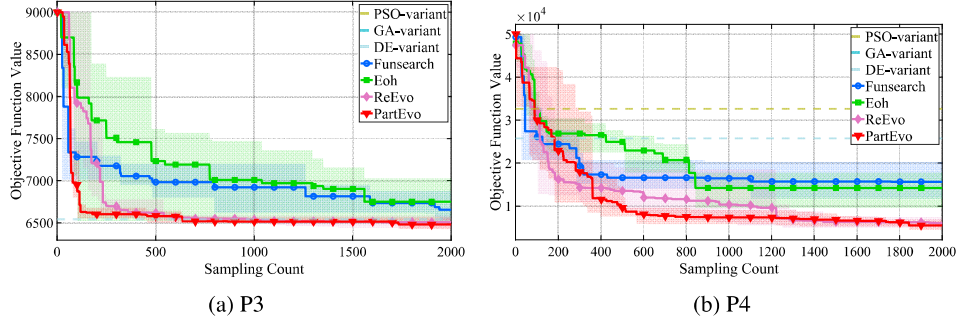

Figure 5: Convergence behaviors of three LES methods across three runs on benchmark P3 and P4.

Figure 5 further illustrates the convergence dynamics. On P3, PartEvo surpasses the human-designed DE variant baseline with only 600 queries and continues to improve, while ReEvo catches up after about 1000 queries. Funsearch and EoH converge more slowly, indicating lower search efficiency. On P4, PartEvo again dominates the entire trajectory, discovering strong meta-heuristics as early as 500 queries and steadily improving thereafter, demonstrating resilience against local optima. ReEvo progresses more gradually, only approaching PartEvo’s 600-query performance after nearly 1200 queries, while Funsearch and EoH show limited late-stage gains.

By the 500-query mark, PartEvo has already identified highly effective algorithms, leaving limited room for further improvement—a pattern that explains its relatively modest 7.7% gain when the budget increases to 2000. Importantly, this efficiency is not transient but a fundamental property of PartEvo’s search process, making it a consistently robust choice across both constrained and generous budgets.

Overall, these results highlight two key findings: (i) PartEvo achieves remarkable efficiency without premature stagnation, and (ii) integrating mature EC principles into LES is crucial for sustaining effective algorithm discovery under varying computational budgets.

## B.7 Comparative evaluations with different LLMs

To investigate the influence of LLM capability on the overall performance of algorithm discovery, we evaluate PartEvo with three different models: GPT-3.5-turbo, GPT-4o-mini, and GPT-4o. Experiments are conducted on the P4 benchmark with identical initial populations, a fixed budget of 500 samples, and three independent runs for each model. For clarity of presentation, the results of the three runs are sorted in ascending order of performance. The outcomes are summarized in Table 13.

Table 13: Performance comparison of PartEvo with different LLMs on the P4 benchmark.

| LLM           | Run 1  | Run 2  | Run 3   | Average | SEM      |
|---------------|--------|--------|---------|---------|----------|
| GPT-3.5-turbo | 4924.5 | 9200.2 | 13261.9 | 9128.9  | 1965.360 |
| GPT-4o-mini   | 4539.1 | 4679.5 | 10055.4 | 6424.7  | 1482.610 |
| GPT-4o        | 3304.6 | 6028.0 | 8187.5  | 5840.0  | 1153.466 |

Overall, PartEvo demonstrates the ability to generate high-performing algorithms across all tested LLMs. As shown in Table 13, stronger LLMs tend to yield better and more stable performance. These findings support our discussion in Appendix A.2, suggesting that as LLMs continue to advance, we can expect further improvements in PartEvo’s algorithm discovery capability.

## B.8 Comparative evaluations with various clustering methods

In PartEvo, clustering serves as a tool for grouping individuals within the feature space. As we outlined in Section 3.1, PartEvo is designed to be compatible with a variety of clustering methods. We initially chose K-Means for its simplicity, transparency, and widespread use. This deliberate choice allows us to isolate and confirm that the observed performance improvements are primarily due to

the effects of niche-based evolution, rather than influenced by the complexities of more advanced clustering methods.

To further demonstrate PartEvo’s flexibility and compatibility, we conducted additional experiments using three distinct clustering methods: K-Means, Gaussian Mixture Model (GMM), and Spectral Clustering (SC). Each version of PartEvo was initialized with the same feature mapping and initial population to ensure a fair comparison. Each method was run three times independently to ensure the robustness of the results. The experimental results, comparing the performance of these PartEvo variants against the baseline method EoH, are presented in Table 14.

Table 14: Performance comparison of PartEvo with different clustering methods

| Methods         | P1    | P2     | P3      | P4      |
|-----------------|-------|--------|---------|---------|
| EoH             | 1.846 | 800.98 | 7268.22 | 19152.4 |
| PartEvo-K-means | 0.074 | 800.42 | 6539.24 | 6424.7  |
| PartEvo-GMM     | 0.048 | 800.10 | 6580.82 | 5423.5  |
| PartEvo-SC      | 0.075 | 800.01 | 6543.54 | 6714.2  |

As the results show, all PartEvo variants consistently and significantly outperform EoH across all four benchmarks, regardless of the specific clustering method used. On problems P1, P2, and P3, the performance metrics for PartEvo-K-means, PartEvo-GMM, and PartEvo-SC are remarkably similar, all achieving superior results to EoH. On the P4 problem, PartEvo-GMM shows a slight edge over the other two PartEvo variants, but this minor difference does not change the overarching conclusion that PartEvo, as a framework, is fundamentally superior to the baseline method.

These findings strongly support our claim that the PartEvo framework is compatible with various clustering algorithms. Furthermore, they provide compelling evidence that the core advantage of our approach lies in its niche-based evolutionary mechanism, rather than the specific complexities of any single clustering method. This adaptability allows practitioners to select a clustering algorithm based on the specific requirements of their application.

## C An example of PartEvo in practice

To facilitate a better understanding of how PartEvo operates in practice, this section presents both the pseudocode and a concrete application example.

### C.1 Pseudocode of PartEvo

The pseudocode in Algorithm 1 outlines the overall procedure of PartEvo. Given a natural language description of the algorithm design problem and a set of evaluation instances, PartEvo autonomously generates customized algorithms.

---

#### Algorithm 1 Pseudocode of PartEvo

---

**Require:** Task description, training instances

- 1: Initialize the algorithm population
  - 2: Construct algorithm niches via *feature-assisted niche construction*
  - 3: **while** termination condition not met **do**
  - 4:     **for** each niche in parallel **do**
  - 5:         **for** each evolutionary operator **do**
  - 6:             Select parent algorithms
  - 7:             Construct few-shot prompt (parents + task description + operator-specific instructions)
  - 8:             Generate offspring algorithm via LLM
  - 9:             Evaluate offspring on training instances
  - 10:            Manage offspring at the niche level
  - 11:         **end for**
  - 12:     **end for**
  - 13: **end while**
  - 14: **return** Best designed algorithm so far
-

In **Line 1**, the initial algorithm population is generated either using a batch initialization strategy with LLMs or by loading pre-existing algorithms. In **Line 2**, algorithm niches are constructed based on the initial population using *feature-assisted niche construction*. The process then enters an iterative evolutionary loop (**Lines 3-13**), which continues until a predefined termination condition is met, such as reaching a maximum number of generations or achieving a target fitness threshold. Within this loop, evolution occurs in parallel across each niche (**Line 4**). In each niche, designed evolutionary operators are applied sequentially or in a random order to generate new algorithms (**Lines 5-10**). Each algorithm generation step includes selecting parent algorithms, constructing prompts, generating offspring algorithms using LLMs, evaluating the offspring, and managing the individuals at the niche level. Finally, the best-performing algorithm is returned at **Line 14**.

## C.2 A concrete example on benchmark P1

As an example, consider Benchmark P1, where the goal is to discover meta-heuristic algorithms for unimodal optimization problems. PartEvo initiates the process by defining the task description and preparing a set of training instances. The task description specifies the algorithm design problem, guiding PartEvo in generating relevant algorithms, as depicted in Figure 14. The training instances serve as practice problems, providing a consistent basis for evaluating and ranking candidate algorithms during the evolutionary process. These instances are representative of the problem domain and help refine the algorithms’ effectiveness on the task. In the case of P1, the goal is to solve unimodal optimization problems, for which standard unimodal optimization functions are chosen as the target functions.

Subsequently, PartEvo proceeds through iterative evolutionary loops. In each loop iteration, parent algorithms are selected, prompts are constructed, new offspring algorithms are generated by the LLM, and these offspring algorithms are evaluated and managed. The prompt construction follows the template described in Appendix D. Through repeated iterations, the algorithm population gradually improves, with the best-performing algorithms emerging as specialized solutions to unimodal optimization problems.

This workflow generalizes beyond unimodal optimization. For any benchmark or real-world application, one only needs to specify the problem and provide representative training instances; **PartEvo** will then evolve tailored algorithms accordingly.

## D Prompts

This section describes the prompts employed in PartEvo. In all displayed prompts, the black text remains fixed, while the red placeholders correspond to task-specific elements, and the blue placeholders change throughout the evolutionary process.

Figures 6 and 7 show the prompts used by the summarizer and reviewer LLMs. The generator LLMs, which utilize different prompts for each of the four evolutionary operators (e.g., RE, SE, CN, LGE), are detailed in Figures 10 to 13. These prompts are applicable across all four optimization problem types.

Task description prompts for the four problem types are shown in Figure 14. Specifically, all problems are presented as black-box optimization tasks to the LLMs. This approach ensures that PartEvo is effective across a wide range of optimization problems.

## E Feature projection

The general LES framework employs an abstract search space partitioning mechanism that projects sampled individuals into a feature space. In this feature space, clustering is performed based on the distances between the mapped representations, which indirectly partitions the abstract search space into multiple subregions. PartEvo leverages two primary methods for feature mapping:

### E.1 Code similarity vector

Similar individuals should exhibit comparable relative distances to all other individuals. Thus, we construct a Code Similarity Vector (CSV) for each individual to represent its similarity to all

You are the person responsible for recording the progress of the experts' research. Some experts are working on the following task:

“[Task Description Placeholder]”

Based on previous design methods, we have the following summary:

“[Previous Summary Placeholder]”

Experts have now explored an additional [Number Placeholder] algorithms to tackle this problem, ranging from No. 1 to No. [Number Placeholder], with performance gradually declining (the smaller the objective function value, the better the performance).

Algorithm No. 1 has an objective function value of [Value Placeholder], and its idea is:

“[Thought Placeholder]”

Algorithm No. 2 has an objective function value of [Value Placeholder], and its idea is:

“[Thought Placeholder]”

...

Please review the previous experiences and the current algorithms, analyzing which techniques within the algorithms are effective in solving this problem and which are not. Finally, summarize both the effective and ineffective techniques, and update the previous summary accordingly. Please ensure that the summary you provide is enclosed in braces.

Figure 6: Prompt of summarizer.

An intelligent agent is currently executing the following design task:

“[Task Description Placeholder]”

The agent has designed an algorithm with the following ideas and code:

“[Thought Placeholder]”

“[Code Placeholder]”

Based on your understanding and knowledge of this design task, please provide targeted suggestions for the current algorithm to guide the agent in improving it. Please return your final suggestions in curly braces so that the agent can interpret your advice.

Figure 7: Prompt of reviewer.

You and a group of experts are working on a task:

“[Task Description Placeholder]”

Experts have proposed [Number Placeholder] algorithms to solve this problem. The ideas for these algorithms are as follows:

No. 1 algorithm's idea is: “[Thought Placeholder]”

No. 2 algorithm's idea is: “[Thought Placeholder]”

...

Please create a new algorithm that differs from the existing algorithms by at least [Value Placeholder] %. First, describe your concept for the new algorithm and its main steps in as few words as possible while ensuring clarity. The description must be enclosed in braces. Next, implement it in Python as a runnable function named “[Function Signature Placeholder]”. This function should accept “[Value Placeholder]” input(s): “[Input Placeholder]”. The function should return “[Value Placeholder]” output(s): “[Output Placeholder]”. Do not include any comments in the code.

Figure 8: Prompt of generator for initiation.

others. As a result, the distances between CSVs of similar individuals should be small. Since code is generated by LLMs, there may be many implementations of functionally equivalent code. In constructing the CSV, we focus on both the syntactic and dataflow similarities between codes. The process of constructing the CSV is as follows:

1. **Pairwise similarity calculation:** For a population of size  $N$ , we compute the pairwise similarity between all individuals and store the results in a similarity matrix  $S$ . Specifically, we use the

You are an algorithm design expert. An intelligent agent is currently executing the following design task:  
**“[Task Description Placeholder]”**  
 The agent has designed an algorithm with the following ideas and code:  
**“[Thought Placeholder]”**  
**“[Code Placeholder]”**  
 An expert has provided some suggestions for this algorithm. You can decide whether to incorporate the expert’s feedback, and then create a new algorithm that differs from the given one but motivated by it. The suggestion is: **“[Reflection Placeholder]”**  
 First, describe your concept for the new algorithm and its main steps in as few words as possible while ensuring clarity. The description must be enclosed in braces. Next, implement it in Python as a runnable function named **“[Function Signature Placeholder]”**. This function should accept **“[Value Placeholder]”** input(s): **“[Input Placeholder]”**. The function should return **“[Value Placeholder]”** output(s): **“[Output Placeholder]”**. You can understand the inputs and outputs based on the current algorithm’s code. Do not include any comments in the code.

Figure 9: Prompt of generator in RE.

You are an algorithm design expert. An intelligent agent is currently executing the following design task:  
**“[Task Description Placeholder]”**  
 The agent has designed an algorithm with the following ideas and code:  
**“[Thought Placeholder]”**  
**“[Code Placeholder]”**  
 Please help me create a new algorithm that is different from the given one but motivated by it.  
 First, describe your concept for the new algorithm and its main steps in as few words as possible while ensuring clarity. The description must be enclosed in braces. Next, implement it in Python as a runnable function named **“[Function Signature Placeholder]”**. This function should accept **“[Value Placeholder]”** input(s): **“[Input Placeholder]”**. The function should return **“[Value Placeholder]”** output(s): **“[Output Placeholder]”**. You can understand the inputs and outputs based on the current algorithm’s code. Do not include any comments in the code.

Figure 10: Prompt of generator in Mutation.

You are an algorithm design expert, currently collaborating with other experts on the following task:  
**“[Task Description Placeholder]”**  
 Experts have designed **“[Value Placeholder]”** algorithms with their corresponding codes.  
 The No. 1 algorithm and the corresponding code are:  
**“[Thought Placeholder]”**  
**“[Code Placeholder]”**  
 The No. 2 algorithm and the corresponding code are:  
**“[Thought Placeholder]”**  
**“[Code Placeholder]”**  
 ...  
 Please take Algorithm No. 1 as the main framework and try to incorporate the characteristics of the other algorithms into it to create a better algorithm. First, describe your concept for the new algorithm and its main steps in as few words as possible while ensuring clarity. The description must be enclosed in braces. Next, implement it in Python as a runnable function named **“[Function Signature Placeholder]”**. This function should accept **“[Value Placeholder]”** input(s): **“[Input Placeholder]”**. The function should return **“[Value Placeholder]”** output(s): **“[Output Placeholder]”**. You can understand the inputs and outputs based on the current algorithm’s code. Do not include any comments in the code.

Figure 11: Prompt of generator in CN.

CodeBLEU metric [50] to evaluate the similarity between the code of two individuals. CodeBLEU

You are an algorithm design expert, currently collaborating with other experts on the following task:  
**“[Task Description Placeholder]”**  
 Currently, “[Value Placeholder]” algorithms have been explored for this problem, with their effectiveness decreasing from No. 1 to No. “[Value Placeholder]”. The concepts for these methods are as follows. No. 1 algorithm is: “[Thought Placeholder]”  
 No. 2 algorithm is: “[Thought Placeholder]”  
 ...  
 Please analyze the summary and then modify the following algorithm to create a more promising solution for this problem. The thoughts and code for the algorithm to be modified are as follows:  
**“[Thought Placeholder]”**  
**“[Code Placeholder]”**  
 First, describe your concept for the new algorithm and its main steps in as few words as possible while ensuring clarity. The description must be enclosed in braces. Next, implement it in Python as a runnable function named **“[Function Signature Placeholder]”**. This function should accept “[Value Placeholder]” input(s): “[Input Placeholder]”. The function should return “[Value Placeholder]” output(s): “[Output Placeholder]”. You can understand the inputs and outputs based on the current algorithm’s code. Do not include any comments in the code.

Figure 12: Prompt of generator in SE.

You are an algorithm design expert, currently collaborating with other experts on the following task:  
**“[Task Description Placeholder]”**  
 Experts are divided into several groups, with each group responsible for the development of a specific algorithm cluster. Each cluster incorporates different techniques while maintaining its own framework to explore diverse algorithms.  
 On your algorithm cluster, after several iterations, the current algorithm (idea and the corresponding code) is:  
**“[Thought Placeholder]”**  
**“[Code Placeholder]”**  
 During the iterations in your cluster, a better-performing algorithm appeared, and its idea and code are as follows:  
**“[Thought Placeholder]”**  
**“[Code Placeholder]”**  
 In addition, among all the algorithms tested (including those from other clusters), the best-performing algorithm’s idea and code are as follows:  
**“[Thought Placeholder]”**  
**“[Code Placeholder]”**  
 Using the above information and adhering to the core framework of the current algorithm, please suggest potential improvements to enhance its performance in solving this problem. First, briefly describe your concept for the new algorithm and its main steps. The description must be enclosed in braces. Next, implement it in Python as a function named **“[Function Signature Placeholder]”**. This function should accept “[Value Placeholder]” input(s): “[Input Placeholder]”. The function should return “[Value Placeholder]” output(s): “[Output Placeholder]”. You can understand the inputs and outputs based on the current algorithm’s code. Do not include any comments in the code.

Figure 13: Prompt of generator in LGE.

proposes weighted n-gram match and syntactic abstract syntax tree match to measure grammatical correctness, and introduces semantic data-flow match to calculate logic correctness. In this work, the similarity score between two individuals  $i$  and  $j$  is computed as:

$$S_{i,j} = 0.5 \cdot s_{i,j} + 0.5 \cdot d_{i,j} \quad (1)$$

where  $s_{i,j}$  and  $d_{i,j}$  denote the syntax match score and dataflow match score, respectively. This formulation ensures a balanced evaluation of both syntactic structure and semantic behavior.



You are tasked with solving a black-box **optimization problem/Mixed-Integer Nonlinear Programming (MINLP) problem/integer nonlinear programming (INLP)** using meta-heuristic optimization algorithm. The goal is to minimize the objective value. Please design a metaheuristic algorithm that can effectively solve this optimization problem and return the optimal solution.

Figure 14: Prompt of specific problem.

2. **Symmetrization:** CodeBLEU scores are not inherently symmetric, i.e.,  $S_{i,j} \neq S_{j,i}$ , which may lead to inconsistencies in the similarity matrix. To address this, we enforce symmetry by averaging the scores:

$$S = \frac{S + S^T}{2}. \quad (2)$$

This step ensures that the similarity relationship between any two individuals is consistent and interpretable.

3. **Feature representation:** For each individual, the corresponding row of the similarity matrix is used as its CSV, capturing its relative relationship with all other individuals in the population.

## E.2 Thought embedding

In PartEvo, individuals are encoded into two components: code and thought. For the thought component, expressed in natural language, we leverage techniques from natural language processing to perform feature projection. Specifically, we utilize pre-trained language models, such as BERT [63], to extract high-dimensional semantic representations of the algorithmic descriptions provided by individuals. The similarity between individuals is then determined based on the distances between their embedding vectors. The process is as follows:

1. **Text tokenization:** The algorithmic description of each individual is tokenized using the BERT tokenizer, ensuring truncation and padding to a maximum sequence length of 512 tokens.
2. **Embedding extraction:** The tokenized input is fed into a pre-trained BERT model, and the hidden state of the token from the final layer is extracted as the embedding. This embedding is a fixed-length vector capturing the semantic meaning of the input text.
3. **Feature representation:** The extracted embeddings are directly used as feature vectors for the individuals.

## E.3 Random features for comparison

To evaluate the effectiveness of the adopted feature projections, we also introduce random feature vectors as a baseline. For each individual, a random vector is generated by sampling from a Gaussian distribution with a dimensionality consistent with the other feature representations. As shown in Table 5, the comparison with random features demonstrates that the proposed feature projections significantly enhance the performance of PartEvo. This improvement is one of the key reasons why PartEvo achieves higher search efficiency compared to Funsearch, which employs an island model.

# F Human-designed meta-heuristic algorithms

In this work, we use human-designed meta-heuristic algorithms as baselines. Specifically, we adopt enhanced variants of Genetic Algorithm (GA), Differential Evolution (DE), and Particle Swarm Optimization (PSO). Detailed descriptions of these variants are provided below.

## F.1 GA-variant

GA is a classical meta-heuristic optimization algorithm inspired by the process of natural selection. It iteratively evolves a population of candidate solutions through genetic operations such as selection, crossover, and mutation. The GA-variant used in this work incorporates several enhancements to improve its performance and convergence behavior. These enhancements include:

- **Selection:** A hybrid selection mechanism combining Roulette Wheel Selection (RWS) and Tournament Selection (TS) is employed. TS is used as the primary selection method, with a tournament size of 3, while RWS ensures diversity preservation.
- **Crossover:** Simulated Binary Crossover (SBX) is adopted as the primary crossover operator. SBX generates offspring by simulating the distribution of genes in natural reproduction, with a crossover rate of 0.9 and a distribution index  $\eta = 2$ . Single-point crossover is also supported as a fallback.
- **Mutation:** Gaussian Mutation and Uniform Mutation are used to introduce diversity into the population. Gaussian Mutation adds normally distributed noise to selected genes, with a mutation rate of 0.1.
- **Fitness normalization:** To mitigate the effects of extreme fitness values, a normalization step is applied to the fitness scores before selection.
- **Elitism:** The best solution in the current generation is preserved and directly passed to the next generation, ensuring that the global best solution is not lost.
- **Early stopping:** An early stopping mechanism is implemented to terminate the algorithm if no significant improvement in fitness is observed for 500 consecutive generations. The convergence tolerance is set to  $10^{-6}$ .

The GA variant is designed to balance exploration and exploitation effectively. The use of hybrid selection and advanced crossover/mutation operators ensures that the algorithm can explore the search space thoroughly, while elitism and early stopping mechanisms help accelerate convergence and avoid stagnation.

## F.2 DE-variant

DE is a population-based optimization algorithm that relies on mutation, crossover, and selection operators to iteratively improve candidate solutions. The DE variant used in this work incorporates several enhancements to improve its convergence speed, robustness, and ability to escape local optima. These enhancements include:

- **Adaptive mutation factor and crossover probability:** The mutation factor  $F$  and crossover probability  $CR$  are dynamically adjusted during the optimization process. Specifically,  $F$  and  $CR$  are sampled from uniform distributions in the ranges  $[0.5, 0.8]$  and  $[0.5, 0.9]$ , respectively, to balance exploration and exploitation.
- **Global best participation:** The global best solution is incorporated into the mutation process to guide the search towards promising regions of the solution space. This modification improves convergence by leveraging the knowledge of the current best solution.
- **Diversity maintenance:** To avoid premature convergence, random perturbations are introduced when population diversity is low. This helps the algorithm escape local optima and explore new regions of the search space.
- **Boundary handling:** A reflection boundary handling strategy is used to prevent solutions from being stuck at the boundaries of the search space. This ensures that mutated solutions remain within valid bounds while preserving diversity.
- **Early stopping:** An early stopping mechanism is implemented to terminate the algorithm when no significant improvement in fitness is observed for 500 consecutive generations. The convergence tolerance is set to  $10^{-6}$ .
- **Parallel evaluation:** For computational efficiency, the evaluation of the objective function is parallelized when possible, particularly for computationally expensive objective functions.

The DE variant is designed to enhance the standard DE algorithm's performance in solving complex optimization problems. By incorporating adaptive parameters, diversity maintenance, and boundary handling, it achieves a good balance between exploration and exploitation. The early stopping mechanism further improves computational efficiency by avoiding unnecessary evaluations when the algorithm has converged.

### F.3 PSO-variant

Particle Swarm Optimization (PSO) is a population-based optimization algorithm inspired by the social behavior of bird flocks and fish schools. In PSO, particles explore the search space by updating their positions and velocities based on their own best-known positions and the global best-known position. The PSO variant used in this work integrates several advanced mechanisms to enhance its convergence performance and robustness. These enhancements include:

- **Dynamic inertia weight:** The inertia weight  $w$  is linearly decreased from  $w_{\max} = 0.95$  to  $w_{\min} = 0.4$  over the course of the optimization to balance global exploration and local exploitation.
- **Simulated Annealing (SA):** A simulated annealing mechanism is incorporated to probabilistically accept worse solutions during the optimization process. This helps the algorithm escape local optima, with the acceptance probability controlled by a temperature parameter that decreases exponentially.
- **Genetic Algorithm (GA) operators:** Genetic algorithm-inspired operators, including crossover and mutation, are integrated to further enhance diversity. Specifically:
  - *Crossover:* Offspring particles are generated by combining the local best positions and the global best position using a weighted random combination.
  - *Mutation:* A small mutation probability ( $p_m = 0.02$ ) is used to introduce random perturbations to particles.
- **Boundary handling:** A reflection boundary handling strategy is applied to ensure particles remain within the feasible search space. This prevents particles from being stuck at the boundaries while maintaining diversity.
- **Velocity clamping:** The velocity of each particle is clamped to prevent it from exceeding the maximum allowable velocity, which is proportional to the search space bounds.
- **Hybrid fitness evaluation:** The fitness of each particle is evaluated using a combination of PSO updates, GA operators, and simulated annealing, ensuring a robust exploration of the search space.

The PSO variant combines elements from PSO, GA, and SA, making it a hybrid algorithm that leverages the strengths of each method. The dynamic inertia weight helps balance exploration and exploitation, while the simulated annealing and genetic operators enhance the algorithm’s ability to escape local optima. These modifications make the PSO variant well-suited for solving complex optimization problems.

### F.4 Comparison and analysis

To directly compare the performance of the standard and enhanced versions of GA, DE, and PSO, we evaluated all methods on four benchmark problems (P1-P4), as summarized in Table 15. In this table, GA, DE, and PSO refer to the standard versions, while GA-variant, DE-variant, and PSO-variant represent the enhanced versions discussed in the main text. Each algorithm was limited to a maximum of 30,000 solution evaluations. The best results are highlighted in bold, while the second-best results are underlined.

Table 15: Best results from multiple runs on training and testing instances for each optimization benchmark (Lower values indicate better performance)

| Problem | Instances | GA                     | GA-variant         | DE                 | DE-variant                           | PSO                | PSO-variant        | PartEvo         |
|---------|-----------|------------------------|--------------------|--------------------|--------------------------------------|--------------------|--------------------|-----------------|
| P1      | Training  | $5.944 \times 10^6$    | 523.182            | 15.849             | <u>0.004</u>                         | 118.973            | 16.241             | <b>0.000</b>    |
|         | Testing   | $6.358 \times 10^{22}$ | 13.145             | <u>0.680</u>       | <b>0.000</b>                         | 50.000             | <b>0.000</b>       | <b>0.000</b>    |
| P2      | Training  | 2485.72                | 2087.63            | 1139.32            | <u>868.40</u>                        | 1467.15            | 939.02             | <b>800.00</b>   |
|         | Testing   | $1.05 \times 10^5$     | 542.48             | 516.96             | <u>365.60</u>                        | $2.11 \times 10^4$ | 411.80             | <b>344.62</b>   |
| P3      | Training  | 15661.66               | 52850.88           | 21379.04           | <u>6541.55</u>                       | 156817.83          | 10036.17           | <b>6471.31</b>  |
|         | Testing   | 78080.20               | 85629.55           | 77851.57           | 61298.43                             | $2.89 \times 10^5$ | <u>60464.14</u>    | <b>56876.40</b> |
| P4      | Training  | $2.60 \times 10^6$     | $1.48 \times 10^7$ | 91784.6            | <u>25736.4</u>                       | 82953.9            | 32594.0            | <b>2792.1</b>   |
|         | Testing   | $5.13 \times 10^7$     | $8.48 \times 10^7$ | $3.78 \times 10^5$ | <u><math>1.72 \times 10^5</math></u> | $6.31 \times 10^6$ | $2.28 \times 10^5$ | <b>14396.1</b>  |

From the table, several key observations can be made. **First**, the performance of different algorithms varies significantly for each problem, highlighting the distinct behaviors of each algorithm within the search space, which allows them to adapt to different landscapes.

**Second**, within each family of algorithms, the enhanced variants typically outperform the standard versions, except for the GA variants on problems P3 and P4. This suggests that targeted algorithmic improvements enable more effective navigation of the solution landscape. However, improper upgrades can lead to performance degradation, underscoring the importance of thoughtful algorithm design.

**Most notably**, the algorithms generated by PartEvo achieve superior performance across all benchmark instances. This is because PartEvo continuously explores techniques that are well-suited to the problem during the evolutionary process, allowing the designed algorithms to efficiently search the landscape. This demonstrates that PartEvo plays a crucial role in automating and enhancing the algorithm design process, highlighting its potential to assist human experts in developing high-performance optimization algorithms.

## G Benchmark

This section introduces the four optimization benchmarks and their specific instances used to evaluate PartEvo. These include synthetic problems, such as unimodal and multimodal optimization problems, as well as real-world scenarios, including task offloading in mobile edge computing systems and machine-level scheduling for heterogeneous plants.

### G.1 Unimodal optimization problem

Unimodal optimization problems feature a single global optimum with no local optima, making it an ideal benchmark for testing basic search capabilities. Algorithms yielded by the LES framework are evaluated on their ability to locate the global optimum in this simple scenario efficiently. This benchmark serves as a baseline to verify PartEvo’s ability to generate algorithms with effective core search mechanisms.

For this study, we utilize various unimodal objective functions. For some of these functions, we introduce a shift term  $s$ . This shift increases the difficulty of optimization, preventing the LES framework from generating algorithms with fixed outputs that could bypass the optimization process. In the experiments, the parameter configurations for the training and testing instances are shown in Table 16. The mathematical formulations and key characteristics of these ten functions are outlined as follows:

Table 16: Unimodal instance setups for the experiments

|                   | Formula                    | Variable Range | Optimal Function Value |
|-------------------|----------------------------|----------------|------------------------|
| Training Instance | $f_1(\mathbf{x})$          | $[-20, 20]$    | 0                      |
|                   | $f_2(\mathbf{x})$          | $[-20, 20]$    | 0                      |
|                   | $f_2(\mathbf{x}, s = 3)$   | $[-20, 20]$    | 0                      |
| Testing Instance  | $f_2(\mathbf{x}, s = 2.5)$ | $[-10, 10]$    | 0                      |
|                   | $f_2(\mathbf{x}, s = 5)$   | $[-10, 10]$    | 0                      |
|                   | $f_3(\mathbf{x}, s = 0)$   | $[-10, 10]$    | 0                      |
|                   | $f_3(\mathbf{x}, s = 2.5)$ | $[-5, 5]$      | 0                      |
|                   | $f_4(\mathbf{x}, s = 1)$   | $[-30, 30]$    | $\approx 0$            |
|                   | $f_5(\mathbf{x})$          | $[-100, 100]$  | $\approx 0$            |
|                   | $f_6(\mathbf{x})$          | $[-100, 100]$  | $\approx 0$            |

**Sphere function.** The Sphere function is a well-known unimodal optimization benchmark, characterized by a global minimum located at the origin. It is mathematically defined as:

$$f_1(\mathbf{x}) = \sum_{i=1}^n x_i^2, \quad (3)$$

where  $\mathbf{x} = [x_1, x_2, \dots, x_n] \in \mathbb{R}^n$  represents the decision variable in an  $n$ -dimensional space. The function exhibits a smooth, symmetric parabolic shape, with the global minimum located at  $\mathbf{x} = 0$ . This simplicity makes it a fundamental benchmark for evaluating optimization algorithms.

**Shifted sphere function.** The Shifted Sphere function is a modified version of the Sphere function, where the global minimum is shifted to a predefined point in the search space. This shift increases the difficulty of the optimization process, preventing trivial solutions. It is mathematically expressed as:

$$f_2(\mathbf{x}, \mathbf{s}) = \sum_{i=1}^n (x_i - s_i)^2, \quad (4)$$

where  $\mathbf{s} = [s_1, s_2, \dots, s_n] \in \mathbb{R}^n$  represents the shift vector, and  $s_i$  denotes the shift applied to the  $i$ -th dimension.

**Unimodal sinusoidal function.** The Unimodal Sinusoidal function is a single-peaked benchmark, characterized by the use of squared sine terms. It is mathematically defined as:

$$f_3(\mathbf{x}, \mathbf{s}) = \sum_{i=1}^n \sin^2(x_i - s_i) \quad (5)$$

This function is particularly useful for testing optimization algorithms on periodic landscapes, as its sinusoidal nature introduces oscillatory behavior while maintaining a single global minimum, making it a valuable benchmark for evaluating algorithm robustness.

**Unimodal Gaussian function.** The Unimodal Gaussian function is a smooth and symmetric benchmark function, characterized by a single peak. It is mathematically expressed as:

$$f_4(\mathbf{x}, \mathbf{s}) = \sum_{i=1}^n \exp(-(x_i - s_i)^2), \quad (6)$$

here,  $\mathbf{s} = [s_1, s_2, \dots, s_n] \in \mathbb{R}^n$  is the shift vector that determines the location of the global minimum. This function is often used in optimization benchmarks due to its smooth, unimodal nature and its ability to test the precision of optimization algorithms.

**Unimodal logistic function.** The Unimodal Logistic function is a smooth, monotonic benchmark function, commonly used to evaluate optimization algorithms in continuous domains. It is mathematically defined as:

$$f_5(\mathbf{x}) = \sum_{i=1}^n \frac{1}{1 + \exp(-x_i)}, \quad (7)$$

This function is particularly useful for testing algorithms in scenarios involving smooth, non-linear transformations.

**Unimodal exponential function.** The Unimodal Exponential function is a monotonic benchmark function characterized by exponential decay. It is mathematically expressed as:

$$f_6(\mathbf{x}) = \sum_{i=1}^n \exp(-x_i), \quad (8)$$

The global minimum of this function is asymptotically approached as each  $x_i$  tends towards positive infinity, making it a useful benchmark for testing optimization algorithms in decaying landscapes.

## G.2 Multimodal optimization problem

Multimodal optimization problems introduce multiple local optima in the search space, making them significantly more challenging. These problems evaluate the designed algorithms' ability to balance exploration and exploitation. Practical algorithms must avoid premature convergence to suboptimal solutions while maintaining a robust search strategy. This benchmark tests PartEvo's ability to address complex optimization landscapes.

We utilize ten multimodal objective functions in our study. Similar to the unimodal optimization benchmarks, we introduce a shift term  $\mathbf{s}$  in certain functions to increase the difficulty of optimization. The parameter configurations for the training and testing instances are summarized in Table 17.

Specifically, the decision variable dimensionality for the training instances is set to 40, while that for the testing instances is set to 50. This setup allows us to evaluate the generalization capability of the metaheuristic algorithms generated by LESSs. The mathematical formulations and key characteristics of these functions are outlined below.

Table 17: Multimodal instance setups for the experiments

|                   | Formula                              | Variable Range  | Optimal Function Value |
|-------------------|--------------------------------------|-----------------|------------------------|
| Training Instance | $f_7(\mathbf{x}, \mathbf{s} = 2)$    | $[-5.12, 5.12]$ | 100                    |
|                   | $f_9(\mathbf{x}, \mathbf{s} = 50)$   | $[-600, 600]$   | 200                    |
|                   | $f_{10}(\mathbf{x}, \mathbf{s} = 5)$ | $[-10, 10]$     | 500                    |
| Testing Instance  | $f_8(\mathbf{x}, \mathbf{s} = 10)$   | $[-10, 10]$     | 50                     |
|                   | $f_{11}(\mathbf{x})$                 | $[-100, 100]$   | 300                    |
|                   | $f_{12}(\mathbf{x})$                 | $[-0.5, 0.5]$   | 10                     |
|                   | $f_{13}(\mathbf{x})$                 | $[-10, 10]$     | 0                      |
|                   | $f_{14}(\mathbf{x})$                 | $[0, \pi]$      | -50                    |

**Modified Rastigin function.** The Modified Rastrigin function is a multimodal benchmark with numerous local minima, making it a popular choice for evaluating optimization algorithms. It is mathematically defined as:

$$f_7(\mathbf{x}, \mathbf{s}) = A \cdot n + \sum_{i=1}^n [(x_i - s_i)^2 - A \cdot \cos(2\pi(s_i))] + 100, \quad (9)$$

where  $A = 10$ , and the search range is  $x_i \in [-5.12, 5.12]$ . The global minimum is located at  $\mathbf{x}^* = \mathbf{s}$ , with an optimal value of  $f(\mathbf{x}^*) = 100$ .

**Modified Ackley function.** The Modified Ackley function is a widely used multimodal benchmark with a complex landscape. It is mathematically expressed as:

$$f_8(\mathbf{x}, \mathbf{s}) = -20 \exp \left( -0.2 \sqrt{\frac{1}{n} \sum_{i=1}^n (x_i - s_i)^2} \right) - \exp \left( \frac{1}{n} \sum_{i=1}^n \cos(2\pi(x_i - s_i)) \right) + 20 + e + 50, \quad (10)$$

where  $e$  is Euler's constant, and the search range is  $x_i \in [-32.768, 32.768]$ . The global minimum is shifted to  $\mathbf{x}^* = \mathbf{s}$ , with an optimal value of  $f(\mathbf{x}^*) = 50$ .

**Modified Griewank function.** The Modified Griewank function features a smooth landscape with numerous local minima. It is mathematically defined as:

$$f_9(\mathbf{x}, \mathbf{s}) = 1 + \frac{1}{4000} \sum_{i=1}^n (x_i - s_i)^2 - \prod_{i=1}^n \cos \left( \frac{x_i - s_i}{\sqrt{i}} \right) + 200. \quad (11)$$

The search range is  $x_i \in [-600, 600]$ . The global minimum is located at  $\mathbf{x}^* = \mathbf{s}$ , with an optimal value of  $f(\mathbf{x}^*) = 200$ .

**Modified Levy function.** The Modified Levy function is known for its rugged landscape and numerous local minima. It is mathematically expressed as:

$$f_{10}(\mathbf{x}, \mathbf{s}) = \sin^2(\pi w_1) + \sum_{i=1}^{n-1} [(w_i - 1)^2 (1 + 10 \sin^2(\pi w_i + 1))] + (w_n - 1)^2 (1 + \sin^2(2\pi w_n)) + 500, \quad (12)$$

where  $w_i = 1 + \frac{x_i - s_i}{4}$ , and the search range is  $x_i \in [-10, 10]$ . The global minimum is located at  $\mathbf{x}^* = \mathbf{s}$ , with an optimal value of  $f(\mathbf{x}^*) = 500$ .

**Modified Schaffer function N.2.** The Modified Schaffer Function N.2 is a two-dimensional multimodal benchmark. It is mathematically expressed as:

$$f_{11}(\mathbf{x}) = 0.5 + \frac{\sin^2((x_1 - 50)^2 - (x_2 + 50)^2) - 0.5}{[1 + 0.001((x_1 - 50)^2 + (x_2 + 50)^2)]^2} + 300. \quad (13)$$

The search range is  $x_i \in [-100, 100]$ , and the global minimum is located at  $\mathbf{x}^* = [50, -50]$ , with an optimal value of  $f(\mathbf{x}^*) = 300$ .

**Modified Weierstrass function.** The Modified Weierstrass function is characterized by its fractal-like landscape. It is mathematically expressed as:

$$f_{12}(\mathbf{x}) = \sum_{i=1}^n \sum_{k=0}^{k_{\max}} a^k \cos(2\pi b^k (x_i + 0.5)) - n \sum_{k=0}^{k_{\max}} a^k \cos(2\pi b^k \cdot 0.5) + 10, \quad (14)$$

where  $a = 0.5$ ,  $b = 3$ ,  $k_{\max} = 20$ , and the search range is  $x_i \in [-0.5, 0.5]$ . The global minimum is located at  $\mathbf{x}^* = [0, 0, \dots, 0]$ , with an optimal value of  $f(\mathbf{x}^*) = 10$ .

**Modified Alpine function.** The Modified Alpine function is a multimodal benchmark, defined as:

$$f_{13}(\mathbf{x}) = \sum_{i=1}^n |x_i \sin(x_i) + 0.1x_i|. \quad (15)$$

The search range is  $x_i \in [-10, 10]$ , and the global minimum is located at  $\mathbf{x}^* = [0, 0, \dots, 0]$ , with an optimal value of  $f(\mathbf{x}^*) = 0$ .

**Modified Michalewicz function.** The Modified Michalewicz function is highly multimodal, defined as:

$$f_{14}(\mathbf{x}) = - \sum_{i=1}^n \sin(x_i) \left[ \sin\left(\frac{ix_i^2}{\pi}\right) \right]^{2m}, \quad (16)$$

where  $m = 10$ , and the search range is  $x_i \in [0, \pi]$ . The global minimum depends on the dimensionality, with an approximate optimal value of  $f(\mathbf{x}^*) \approx -n$ .

### G.3 Task offloading in mobile edge computing systems

Task offloading is a well-established optimization problem in the domains of cloud and edge computing [44]. A representative system architecture is illustrated in Fig. 15. In such systems, numerous smart mobile devices are required to execute computation- and data-intensive applications. However, due to physical limitations, such as restricted device size, these devices often lack sufficient computational resources and energy to process tasks independently. Task offloading addresses this limitation by partitioning computational tasks and offloading them to high-performance servers, either at the edge or in the cloud, for efficient processing.

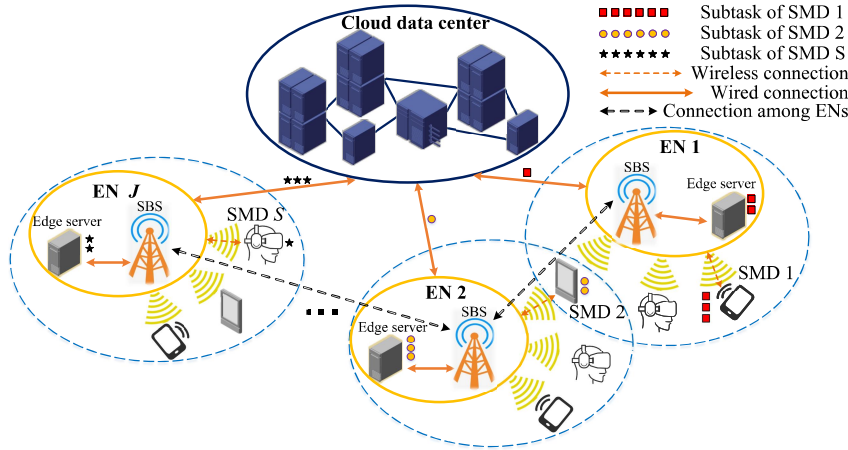

Figure 15: System architecture of a cloud-edge collaborative computing framework

The task offloading problem is inherently constrained by various practical factors, including the characteristics of application tasks, the availability of communication channels, and the computational capacity of edge servers [64]. Consequently, task offloading is frequently formulated as a constrained mixed-integer non-linear programming (MINLP) problem. The objective typically involves minimizing the total system cost, maximizing data throughput, or reducing energy consumption, all while

adhering to the imposed constraints. To tackle these complex problems, meta-heuristic algorithms are widely employed in the literature.

In this study, we treat task offloading as a real-world optimization problem to evaluate the algorithmic capabilities of PartEvo. The performance of the algorithms designed within LESs on this benchmark reflects their ability to address real-world optimization problems with intricate constraints and real-time requirements.

To this end, we implement a task offloading system model inspired by prior studies [44, 65]. The optimization objective is to minimize the total system cost. To simulate diverse real-world scenarios, we design multiple instances by varying the number of users, user request types, and user distributions. The configurations of the instances used for training and testing are summarized in Table 18.

Table 18: Configurations of task offloading instances for experiments

|                    | Instance Index | Number of Users | Average Task Size (GB) |
|--------------------|----------------|-----------------|------------------------|
| Training Instances | 1              | 15              | 150                    |
|                    | 2              | 30              | 150                    |
| Testing Instances  | 3              | 5               | 50                     |
|                    | 4              | 15              | 300                    |
|                    | 5              | 45              | 10                     |
|                    | 6              | 20              | 0                      |
|                    | 7              | 30              | 200                    |
|                    | 8              | 1               | 100                    |

#### G.4 Machine-Level scheduling for heterogeneous plants

Scheduling and production planning are among the most critical challenges in industrial manufacturing, as they directly impact the efficiency and cost-effectiveness of operations. In a complete production supply chain, from the moment a customer places an order, every stage—ranging from raw material procurement to the production of semi-finished components and the final assembly of diverse products—requires meticulous scheduling and coordination. Under the paradigm of industrial Internet, the entire supply chain can be modeled as a collaborative manufacturing and scheduling (CMS) system, composed of multiple heterogeneous factories. The architecture of such a system is illustrated in Figure 16.

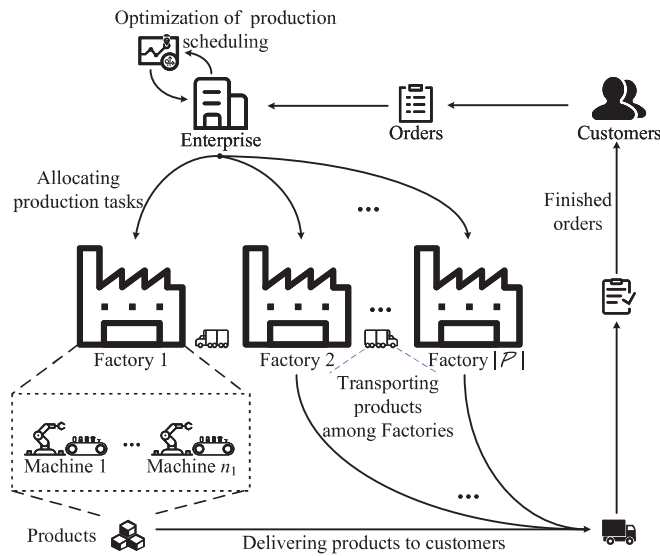

Figure 16: Architecture of a collaborative manufacturing and scheduling system.



The CMS framework involves four primary entities: enterprises, customers, a transportation system, and multiple factories. Within the system, there are  $|\mathcal{P}|$  factories, and each factory  $p$  ( $1 \leq p \leq |\mathcal{P}|$ ) contains  $n_p$  machines. Raw materials, semi-finished products, and finished goods are transported among factories and delivered to customers via the transportation system. The workflow proceeds as follows: a customer places an order with the enterprise, which then formulates a manufacturing and scheduling plan based on the order’s requirements, including product types, quantities, and delivery deadlines. Subsequently, the enterprise assigns production tasks to machines across different factories and coordinates the transportation of products. Finally, the transportation system delivers the completed products directly to customers, fulfilling the order. To minimize the overall cost of the CMS system, it is essential to optimize the collaboration among factories, encompassing manufacturing, transportation, and sales processes.

In this context, we use the term “product” to broadly refer to all production components, including raw materials, semi-finished products, and finished goods. The production scheduling process consists of several interdependent plans: (1) production plans for different factories, (2) substitution plans for interchangeable products, (3) transportation plans for products between factories, and (4) delivery plans specifying the number of products shipped from each factory to customers. Notably, the factories within the CMS system exhibit heterogeneous characteristics, which introduce additional complexities:

1. Heterogeneous manufacturing capacities: Different factories have varying production capabilities for different products, resulting in diverse time and material costs for manufacturing the same product.
2. Variable transportation costs: Due to differing distances between factories and between factories and customers, transportation costs vary significantly across the system.
3. Complex product relationships: Certain products can substitute for others (e.g., a large resistor can be replaced by two smaller resistors in series), while others may be consumed as intermediate inputs in the production of other products. Properly managing these dependencies is critical for cost reduction.

The objective of the scheduling process is to allocate production tasks to machines and coordinate the inter-factory transportation of intermediate products. The goal is to minimize the combined production and transportation costs while ensuring that all customer orders are completed within their respective deadlines. This problem represents a large-scale combinatorial optimization challenge, often formulated as a constrained nonlinear integer programming problem. Numerous studies have explored the use of meta-heuristic algorithms to address such production scheduling problems.

In this study, we evaluate the performance of our proposed framework, PartEvo, on this industrial scheduling benchmark. PartEvo is designed to generate meta-heuristics capable of addressing large-scale, high-dimensional optimization problems with complex interdependencies. By benchmarking PartEvo on this real-world problem, we aim to assess its ability to develop efficient and effective scheduling strategies.

Table 19: Configurations of machine-level scheduling instances for experiments

|                    | Instance Index | Product Types | Factory Number | Planning Horizon |
|--------------------|----------------|---------------|----------------|------------------|
| Training Instances | 1              | 9             | 3              | 7 days           |
|                    | 2              | 9             | 3              | 7 days           |
| Testing Instances  | 3              | 9             | 5              | 7 days           |
|                    | 4              | 10            | 3              | 7 days           |

To this end, we implement a CMS system model inspired by prior work [45]. The optimization objective is to minimize the total cost of production and transportation. To simulate diverse real-world scenarios, we construct multiple problem instances by varying key parameters, including the number of product types, the number of factories, the number of production lines per factory, and the planning horizon. The configurations of these instances, used for both training and testing, are summarized in Table 19.

## H Generated meta-heuristic algorithms

This section presents the highest-performing meta-heuristic algorithm generated by PartEvo across all benchmark problems. These codes illustrate that PartEvo can design highly complex yet well-structured algorithms. These empirically validated solutions can be readily deployed to address analogous optimization challenges, demonstrating significant practical utility.

**Meta-heuristic 1** represents the most effective algorithm generated by PartEvo for benchmark P1, achieving an optimal fitness value of 0 on both the training and testing sets. Thought of **Meta-heuristic 1** is as follows: “The proposed algorithm is an Enhanced Hybrid Differential Evolution (EHDE) approach. It combines principles from differential evolution and adaptive mechanisms while incorporating niche-like exploration. The algorithm leverages multiple mutation strategies to diversify the search space. It also includes a local refining search that periodically improves the best individual. The key steps are: initialization of the population, evaluation of fitness, application of multiple mutation strategies, a dynamic adaptive learning rate for perturbation, selection of the best solutions, and a local search refinement step. The evaluation process monitors the fitness convergence to terminate early if necessary.” Detailed code can be found in Fig. 17.

```
import numpy as np
from scipy.optimize import minimize

def algo(initial_population, individual_upper, individual_lower, objective_function):
    max_evaluations = 30000
    evaluations = 0
    num_individuals, num_dimensions = initial_population.shape
    population = initial_population.copy()
    best_solution = population[np.argmin([objective_function(ind) for ind in population])]

    while evaluations < max_evaluations:
        niche_fitness = np.array([objective_function(ind) for ind in population])
        best_niche_indices = np.argsort(niche_fitness)[:num_individuals // 5]

        for i in range(num_individuals):
            mutation_strategy = np.random.choice(['best', 'rand'])
            if mutation_strategy == 'best':
                mutation_vector = best_solution + np.random.uniform(-0.5, 0.5,
                                                                    num_dimensions)
            else:
                indices = np.random.permutation(num_individuals)[:3]
                x1, x2, x3 = population[indices]
                mutation_vector = x1 + 0.5 * (x2 - x3)
            mutation_vector = np.clip(mutation_vector, individual_lower, individual_upper)

            crossover_mask = np.random.rand(num_dimensions) < 0.5
            trial_vector = np.where(crossover_mask, mutation_vector, population[i])
            trial_vector = np.clip(trial_vector, individual_lower, individual_upper)

            new_fitness = objective_function(trial_vector)
            evaluations += 1

            if new_fitness < niche_fitness[i]:
                population[i] = trial_vector
                if new_fitness < objective_function(best_solution):
                    best_solution = trial_vector

        for idx in best_niche_indices:
            local_search_candidate = minimize(objective_function, population[idx], bounds
                                             =list(zip(individual_lower, individual_upper))).x
            new_local_fitness = objective_function(local_search_candidate)
            evaluations += 1

            if new_local_fitness < objective_function(best_solution):
                best_solution = local_search_candidate

        if np.std(niche_fitness) < 1e-5:
            break

    return best_solution
```

Figure 17: The best PartEvo-generated Meta-heuristic for P1.

**Meta-heuristic 2** represents the most effective algorithm generated by PartEvo for benchmark P2. It achieves an optimal fitness value of 800 on the training sets and outperforms the algorithms generated by the peer LES method on the testing set. Thought of **Meta-heuristic 2** is as follows: This algorithm, named Enhanced Adaptive Chaotic Differential Evolution with Dynamic Local Search and Diversity Management (EACDE-DLSDM), refines the existing EACDE framework by incorporating enhanced chaotic initialization, strategic adjustment of mutation rates, adaptive local search techniques, and a more robust diversity maintenance strategy. By optimizing the balance between exploration and exploitation, the algorithm systematically updates the population based on performance feedback, dynamically alters the local search radius based on stagnation detection, and integrates both structured and random local searches for improved solution refinement. This approach aims to effectively minimize the objective function while ensuring diverse and high-quality solutions are retained throughout the optimization process.” Detailed code can be found in Fig. 18.

**Meta-heuristic 3** represents the most effective algorithm generated by PartEvo for benchmark P3. It outperforms widely used DE-based hybrid algorithms. To ensure execution efficiency, it employs multi-processing for computation. Thought of **Meta-heuristic 3** is as follows: “The modified algorithm, named Enhanced Adaptive Hybrid Differential Evolution with Self-Adjusting Local Search (EAHDE-SALS), incorporates several key improvements over the original AHDE-SALS framework. It utilizes advanced adaptive mechanisms that dynamically adjust both mutation and crossover rates based on population diversity and solution success. The local search component has been enhanced with a hybrid mechanism that combines perturbative refinement with gradient-awareness to optimally exploit promising regions of the solution space. The memory management system is refined to retain not just elite solutions but also a diverse set of high-performing candidates, ensuring that exploration of the solution space remains effective and robust. The algorithm proceeds through initial population evaluation, global search via differential evolution, localized searches, dynamic parameter adjustments, and concludes once the evaluation limit is reached.” Detailed implementation can be found in Fig. 19.

**Meta-heuristic 4** represents the most effective algorithm generated by PartEvo for benchmark P4. It has achieved impressive results on P4, reducing costs by 90.1% on real-world scheduling compared to human-designed DE-based algorithms. Thought of **Meta-heuristic 4** is as follows: “The proposed algorithm, named "Enhanced Adaptive Hybrid Genetic-Differential Evolution with Enhanced Memory, Dynamic Local Search, and Novel Perturbation Scheme," aims to strike a balance between exploration and exploitation more effectively. Key enhancements include: 1) Implementing a novel approach for elite solution selection that emphasizes diversity, 2) Utilizing an adaptive perturbation strategy that introduces variations to the population, drawn from both elite solutions and randomly generated candidates, 3) Enhancing the local search process to explore the neighborhood of elite solutions more aggressively, using a combined memory that recalls previous successful perturbations, and 4) Integrating a cooling temperature mechanism to modulate mutation strength dynamically. The iterative process will continue until the evaluation limit is reached, ensuring the best-found solution is returned at the end.” Detailed implementation can be found in Fig. 20.

## I Licenses for used assets

Since Funsearch is not officially open-source, we conducted our experiments using the version of Funsearch provided on the LLM4AD platform.

Table 20: Asset Usage and License Information

| Type    | Asset         | License     | Usage      |
|---------|---------------|-------------|------------|
| Code    | Funsearch [6] | MIT License | Evaluation |
|         | EoH [7]       | MIT License | Evaluation |
|         | ReEvo [8]     | MIT License | Evaluation |
| Dataset | LLM4AD [49]   | MIT License | Testing    |

```

def logistic_map(x, r=3.99):
    return r * x * (1 - x)

def algo(initial_population, individual_upper, individual_lower, objective_function):
    population = initial_population.copy()
    best_solution = population[0]
    best_value = objective_function(best_solution)
    evaluations = len(population)
    max_evaluations, stagnation_count, stagnation_limit = 30000, 0, 1500
    local_search_radius = 0.1 * (individual_upper - individual_lower)
    mutation_base, diversification_rate = 0.5, 0.15
    while evaluations < max_evaluations:
        if stagnation_count >= stagnation_limit:
            diversification_count = int(len(population) * diversification_rate)
            for _ in range(diversification_count):
                random_solution = np.random.uniform(individual_lower, individual_upper,
                    size=population.shape[1])
                population[np.random.randint(population.shape[0])] = random_solution
            local_search_radius *= 0.5
            stagnation_count = 0
        chaos_map = np.zeros_like(population)
        for i in range(population.shape[0]):
            chaos_map[i] = logistic_map(np.random.rand())
            chaos_map[i] = chaos_map[i] * (individual_upper - individual_lower) +
                individual_lower
        population = (population + chaos_map) / 2
        for i in range(population.shape[0]):
            current_solution = population[i]
            current_value = objective_function(current_solution)
            evaluations += 1
            if current_value < best_value:
                best_value = current_value
                best_solution = current_solution.copy()
                stagnation_count = 0
            else:
                stagnation_count += 1
        adaptive_mutation_factor = mutation_base * (1 - best_value / (best_value + 1e-10))
        for i in range(population.shape[0]):
            selected_indices = np.random.choice(population.shape[0], size=3, replace=
                False)
            parent1, parent2 = selected_indices[:2] if objective_function(population[
                selected_indices[0]]) < objective_function(population[selected_indices
                [1]]) else selected_indices[1:3]
            donor_vector = np.clip(population[parent1] + adaptive_mutation_factor * (
                population[parent2] - population[i]), individual_lower, individual_upper)
            trial_solution = np.clip(donor_vector + np.random.normal(scale=0.1 * np.std(
                population), size=population.shape[1]), individual_lower,
                individual_upper)
            trial_value = objective_function(trial_solution)
            evaluations += 1
            if trial_value < best_value:
                best_value = trial_value
                best_solution = trial_solution.copy()
                stagnation_count = 0
        for i in range(population.shape[0]):
            local_neighbor1 = population[i] + np.random.uniform(-local_search_radius,
                local_search_radius, size=population.shape[1])
            local_neighbor2 = population[i] + np.random.uniform(-local_search_radius *
                0.5, local_search_radius * 0.5, size=population.shape[1])
            local_neighbor1 = np.clip(local_neighbor1, individual_lower, individual_upper)
            local_neighbor2 = np.clip(local_neighbor2, individual_lower, individual_upper)
            best_local_solution = local_neighbor1 if objective_function(local_neighbor1)
                < objective_function(local_neighbor2) else local_neighbor2
            neighbor_value = objective_function(best_local_solution)
            evaluations += 1
            if neighbor_value < best_value:
                best_value = neighbor_value
                best_solution = best_local_solution.copy()
                stagnation_count = 0
        if evaluations % 1000 == 0:
            local_search_radius *= 1.05
    return best_solution

```

Figure 18: The best PartEvo-generated Meta-heuristic for P2.

```

import numpy as np
from concurrent.futures import ProcessPoolExecutor

def evaluate_solution(solution, objective_function):
    return objective_function(solution)

def algo(initial_population, individual_upper, individual_lower, objective_function):
    population = initial_population.copy()
    num_individuals, num_variables = population.shape
    evaluations = 0
    best_solution = None
    best_objective = float('inf')
    memory = []
    success_rate = 0.5
    mutation_factor = 0.5
    crossover_rate = 0.5
    elite_size = int(0.1 * num_individuals)
    while evaluations < 30000:
        for i in range(num_individuals):
            indices = list(range(num_individuals))
            indices.remove(i)
            a, b, c = np.random.choice(indices, 3, replace=False)
            mutant = np.clip(population[a] + mutation_factor * (population[b] -
                population[c]), individual_lower, individual_upper)
            trial = np.copy(population[i])
            for j in range(num_variables):
                if np.random.rand() < crossover_rate:
                    trial[j] = mutant[j]

            f_trial = evaluate_solution(trial, objective_function)
            evaluations += 1

            if f_trial < best_objective:
                best_objective = f_trial
                best_solution = trial

            f_current = evaluate_solution(population[i], objective_function)
            if f_trial < f_current:
                population[i] = trial
                success_rate += 1
                if f_trial < best_objective:
                    memory.append(trial)

        diversity = np.std([evaluate_solution(ind, objective_function) for ind in
            population])
        mutation_factor = np.clip(success_rate / num_individuals, 0.1, 1.0)
        crossover_rate = np.clip(success_rate / num_individuals * 0.5, 0.1, 0.9)
        success_rate = 0

        if len(memory) > 10:
            unique_memory = set(map(tuple, memory))
            memory = sorted(list(unique_memory), key=lambda sol: evaluate_solution(sol,
                objective_function))[:10]

        local_search_size = np.clip(0.1 / (1 + diversity), 0.01, 0.1)

        with ProcessPoolExecutor() as executor:
            results = list(executor.map(lambda mem_solution: evaluate_solution(np.clip(
                mem_solution + (np.random.rand(num_variables) * 2 - 1) *
                local_search_size, individual_lower, individual_upper),
                objective_function), memory))
            for index, f_local in enumerate(results):
                evaluations += 1
                if f_local < best_objective:
                    best_objective = f_local
                    best_solution = np.clip(memory[index] + (np.random.rand(num_variables)
                        * 2 - 1) * local_search_size, individual_lower,
                        individual_upper)

        elite_individuals = sorted(population, key=lambda ind: evaluate_solution(ind,
            objective_function))[:elite_size]
        population[-elite_size:] = elite_individuals

    return best_solution

```

Figure 19: Meta-heuristic 3: The best PartEvo-generated Meta-heuristic for P3.

```

def algo(initial_population, individual_upper, individual_lower, objective_function):
    population = np.copy(initial_population)
    population_size, dimensions = population.shape
    eval_count, best_solution, best_fitness = 0, None, float('inf')
    max_evaluations, stagnation_count, max_stagnation = 30000, 0, 100
    elite_count = max(1, population_size // 10)
    initial_temp, cooling_rate, elite_memory = 1.0, 0.95, []
    def latin_hypercube_sampling(size, dimensions, lower, upper):
        intervals = np.linspace(lower, upper, size + 1)
        points = np.random.rand(size, dimensions)
        sample = intervals[:-1] + (intervals[1:] - intervals[:-1]) * points
        return np.clip(sample, lower, upper)
    population = latin_hypercube_sampling(population_size, dimensions, individual_lower,
        individual_upper)
    fitness_values = np.array([objective_function(ind) for ind in population])
    eval_count += population_size
    best_solution = population[np.argmin(fitness_values)]
    best_fitness = np.min(fitness_values)
    elite_memory.append(best_solution)
    while eval_count < max_evaluations:
        selected_indices = np.argsort(fitness_values)[:elite_count]
        parents = population[selected_indices]
        offspring = []
        temp = initial_temp * (cooling_rate ** (eval_count // population_size))
        for _ in range(population_size // 2):
            parent1, parent2 = parents[np.random.choice(parents.shape[0], 2, replace=False)]
            crossover_point = np.random.randint(1, dimensions)
            child1 = np.concatenate((parent1[:crossover_point], parent2[crossover_point:]))
            child2 = np.concatenate((parent2[:crossover_point], parent1[crossover_point:]))
            for child in [child1, child2]:
                if np.random.rand() < 0.5:
                    mutation_idx = np.random.randint(0, dimensions)
                    child[mutation_idx] = np.clip(np.random.uniform(individual_lower[
                        mutation_idx], individual_upper[mutation_idx]) * temp,
                        individual_lower[mutation_idx], individual_upper[mutation_idx])
                    offspring.append(np.clip(child, individual_lower, individual_upper))
        offspring, local_search_steps = np.array(offspring), 5
        for ind in offspring:
            for _ in range(local_search_steps):
                perturb_idx = np.random.randint(dimensions)
                trial_solution = np.copy(ind)
                trial_solution[perturb_idx] = np.clip(np.random.uniform(individual_lower[
                    perturb_idx], individual_upper[perturb_idx]), individual_lower[
                    perturb_idx], individual_upper[perturb_idx])
                if objective_function(trial_solution) < objective_function(ind):
                    ind[:] = trial_solution
        fitness_values = np.append(fitness_values, [objective_function(ind) for ind in
            offspring])
        eval_count += offspring.shape[0]
        combined_population = np.vstack((population, offspring))
        combined_fitness = fitness_values.argsort()[:population_size]
        population = combined_population[combined_fitness]
        fitness_values = fitness_values[combined_fitness]
        current_best_fitness = np.min(fitness_values)
        if current_best_fitness < best_fitness:
            best_fitness = current_best_fitness
            best_solution = population[np.argmin(fitness_values)]
            elite_memory.append(best_solution)
            stagnation_count = 0
        else:
            stagnation_count += 1
        if stagnation_count >= max_stagnation:
            perturb_idx = np.random.randint(0, population_size)
            population[perturb_idx] = np.clip(np.random.rand(dimensions) * (
                individual_upper - individual_lower) + individual_lower,
                individual_lower, individual_upper)
            if elite_memory:
                population[perturb_idx] = np.copy(elite_memory[np.random.choice(len(
                    elite_memory))])
            stagnation_count = 0
            elite_memory = list(set(map(tuple, elite_memory)))
            if len(elite_memory) > elite_count:
                elite_memory = elite_memory[-elite_count:]
    return best_solution

```

Figure 20: The best PartEvo-generated Meta-heuristic for P4.
